# Supplementary material
Source: PubMed Central journal article supplement (PMC2148413)

**a**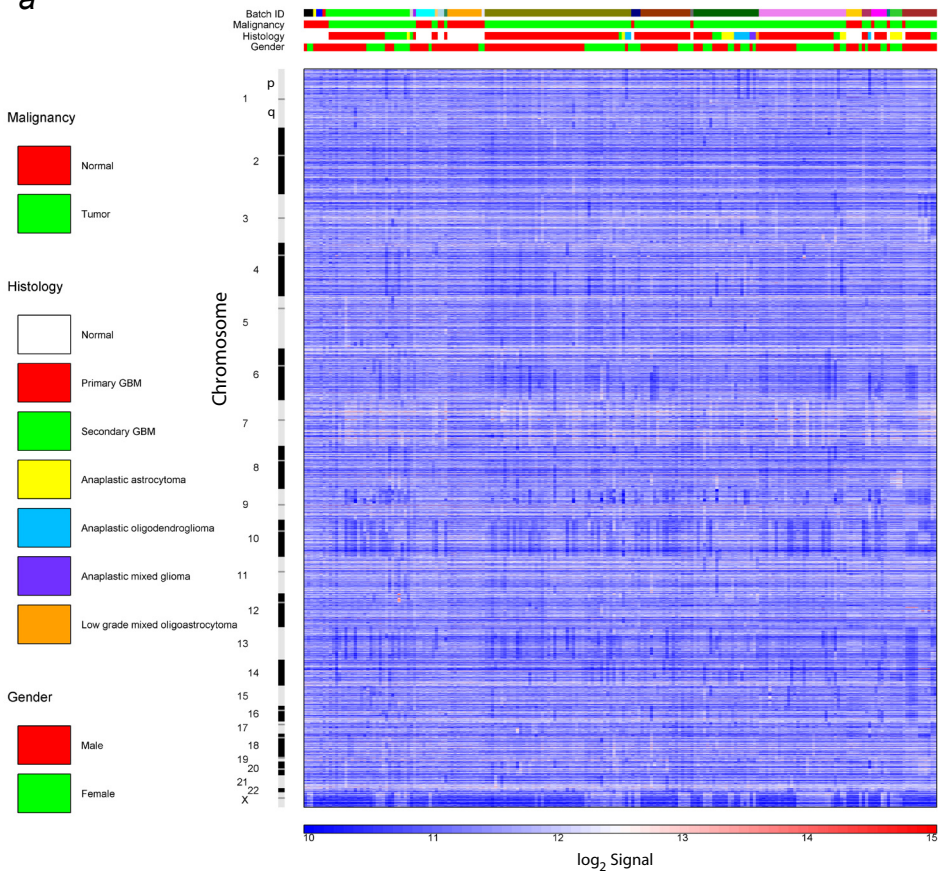

*b*

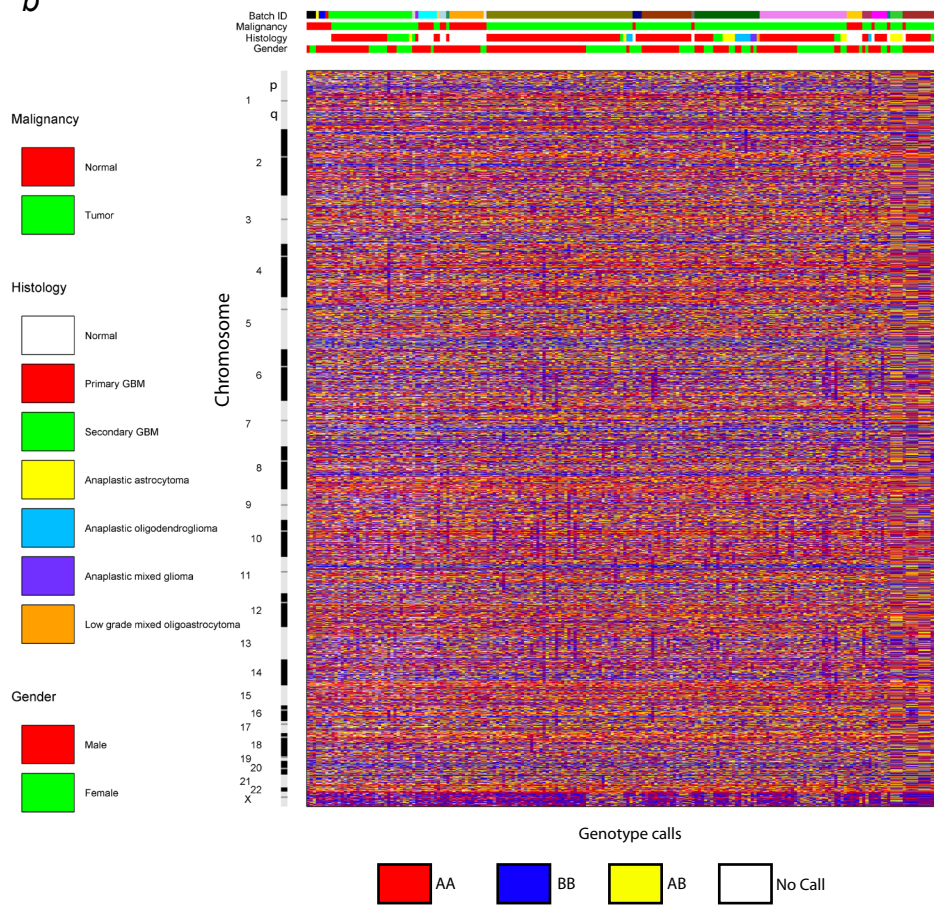

C

Batch ID 

Before batch effect correction

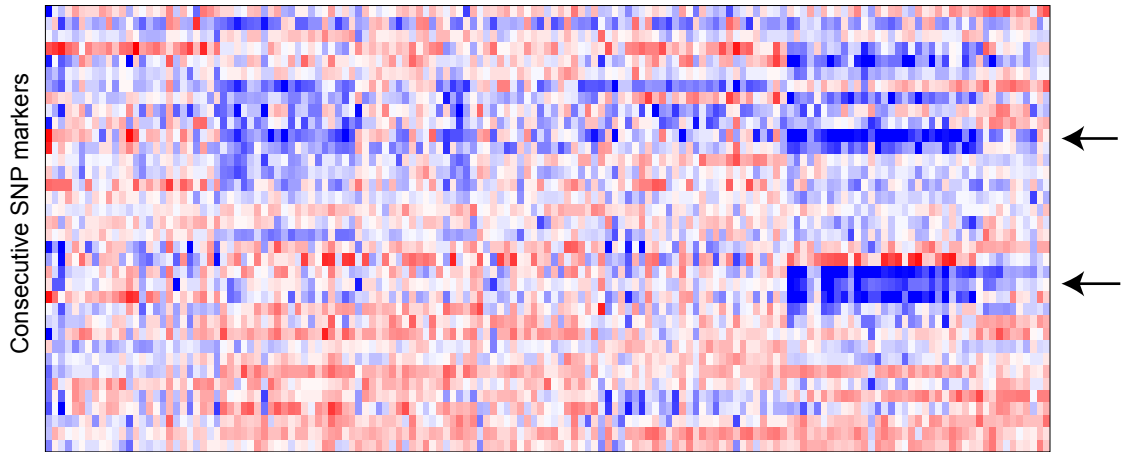

After batch effect correction

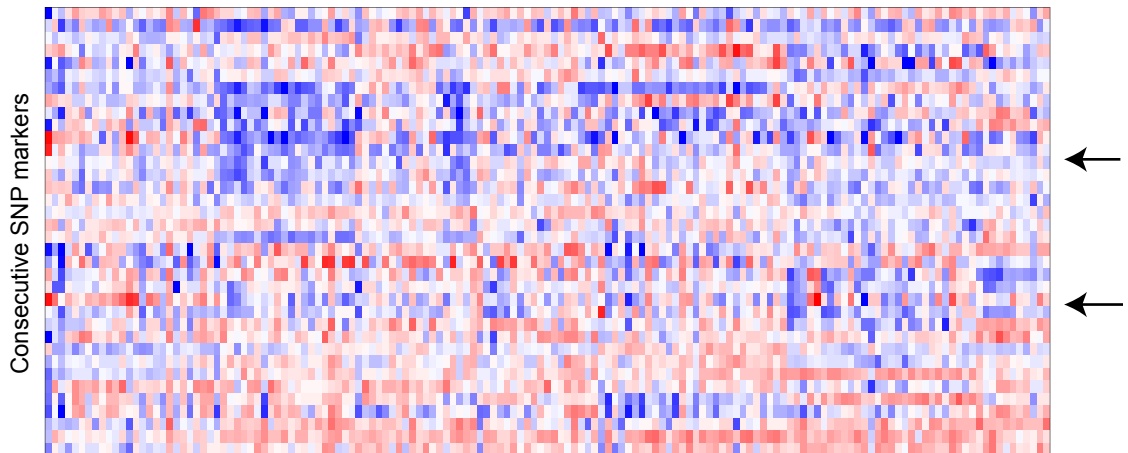

Low signal Neutral High signal

d

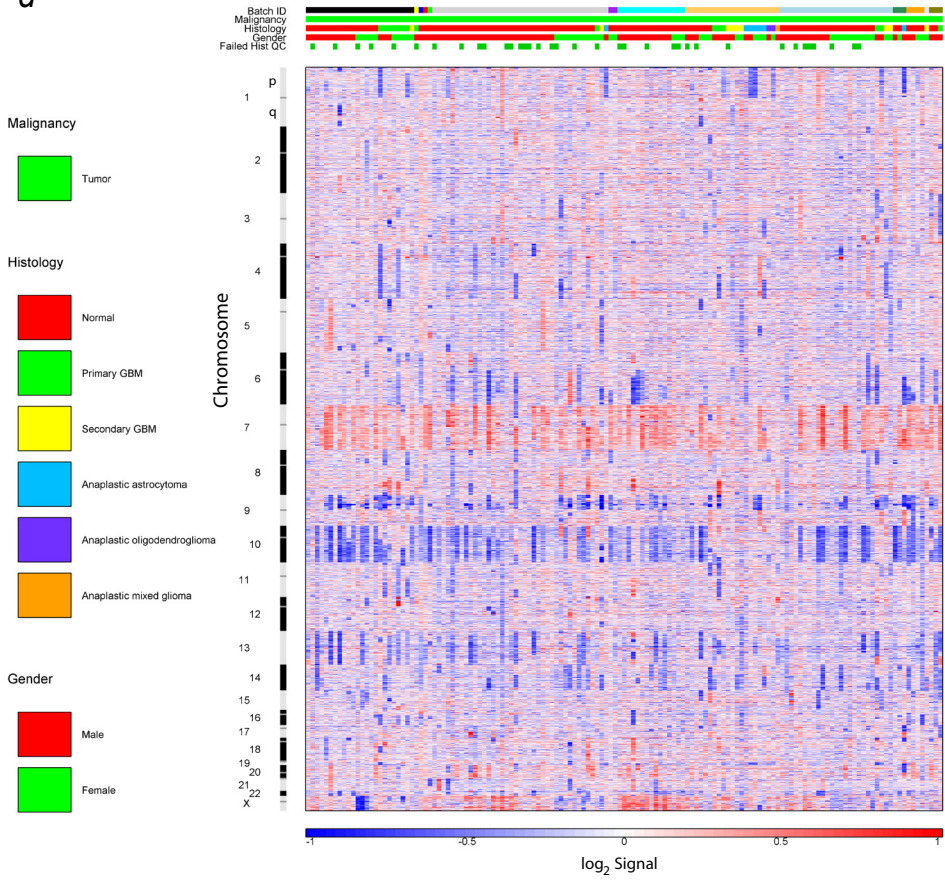

e

### Diagrams of theory

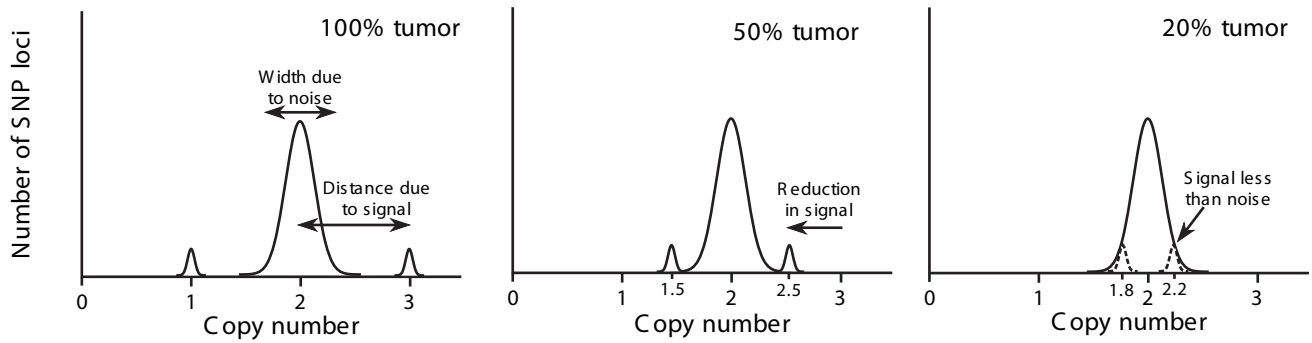

### Example datasets

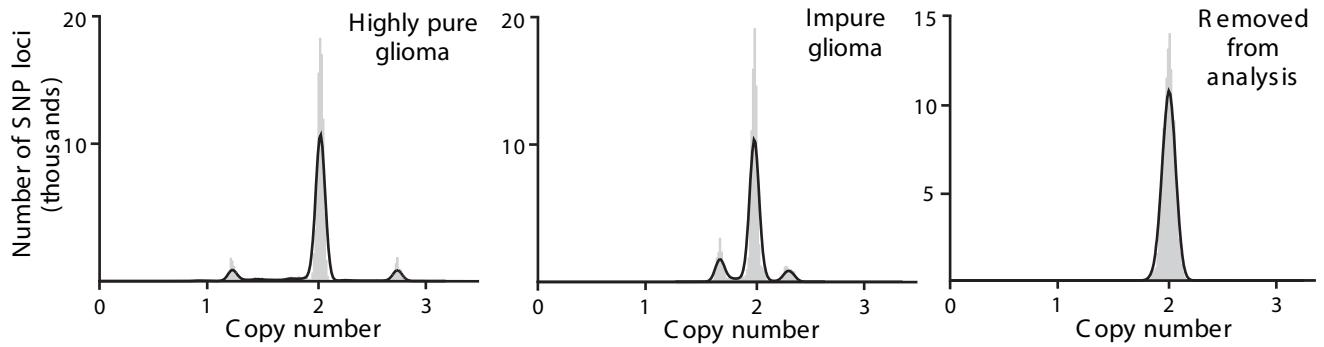

f

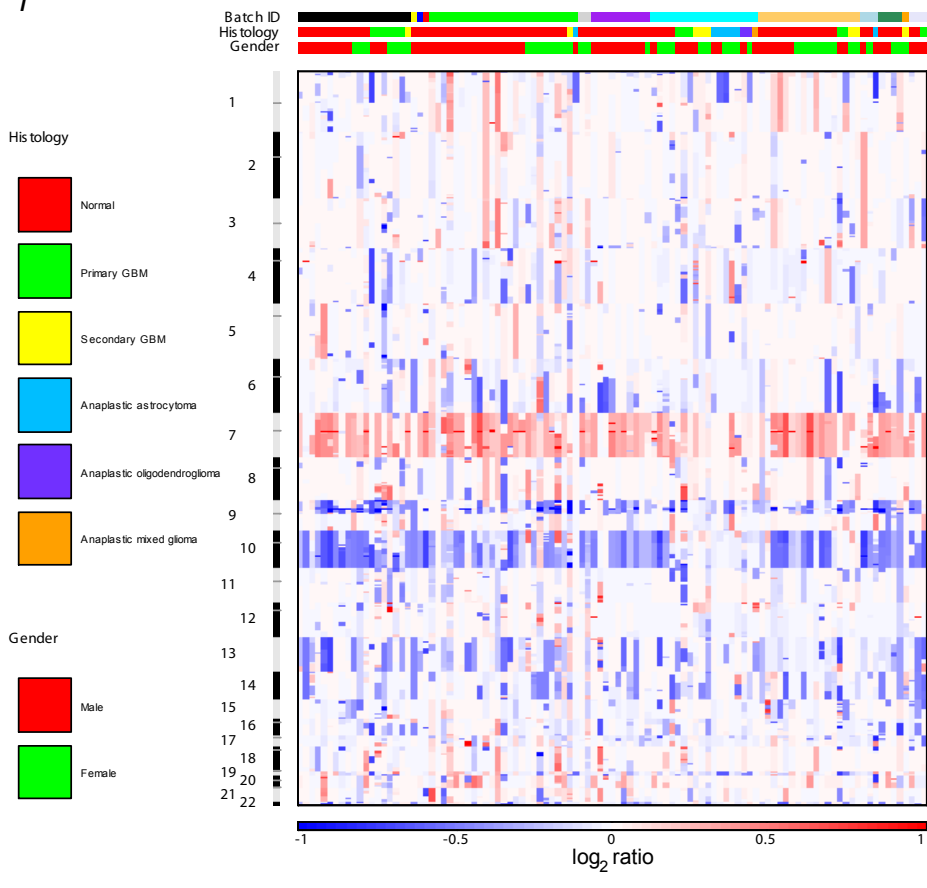

g

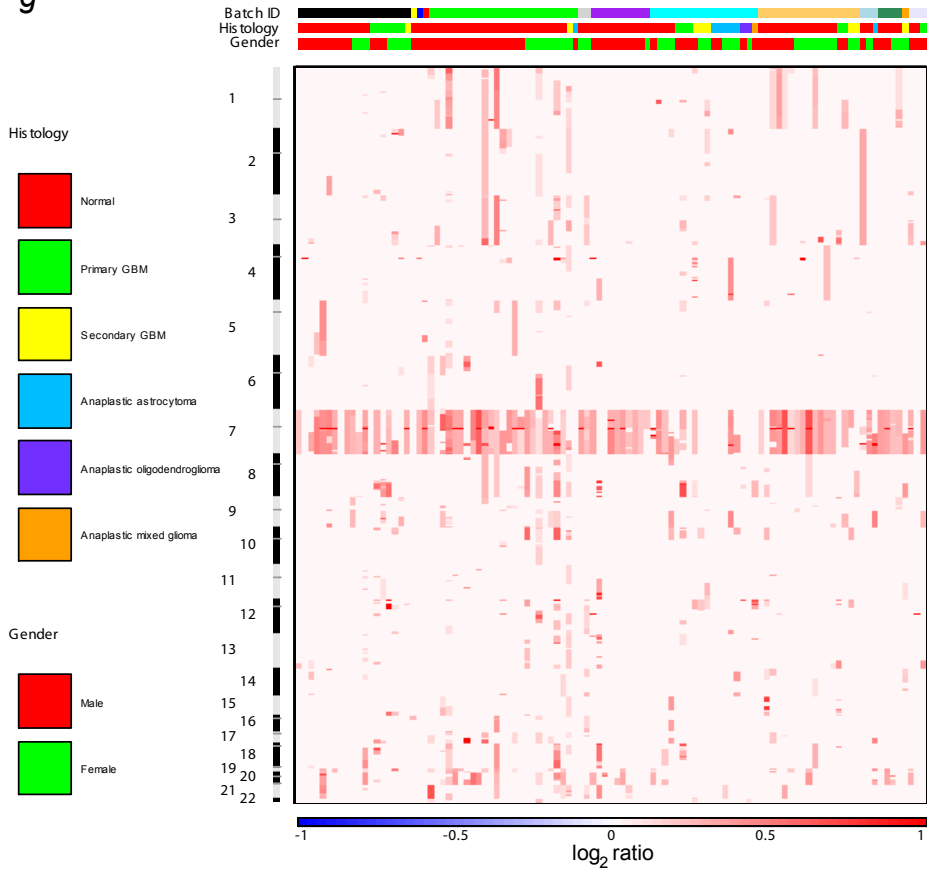

*h*

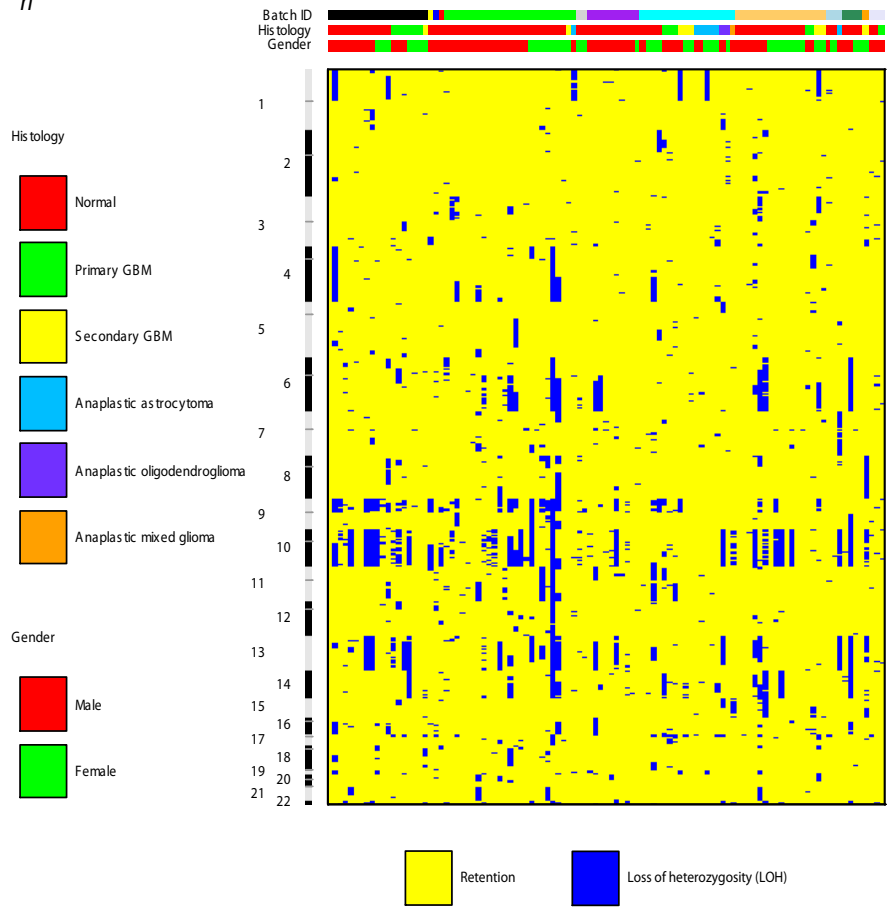



*i*

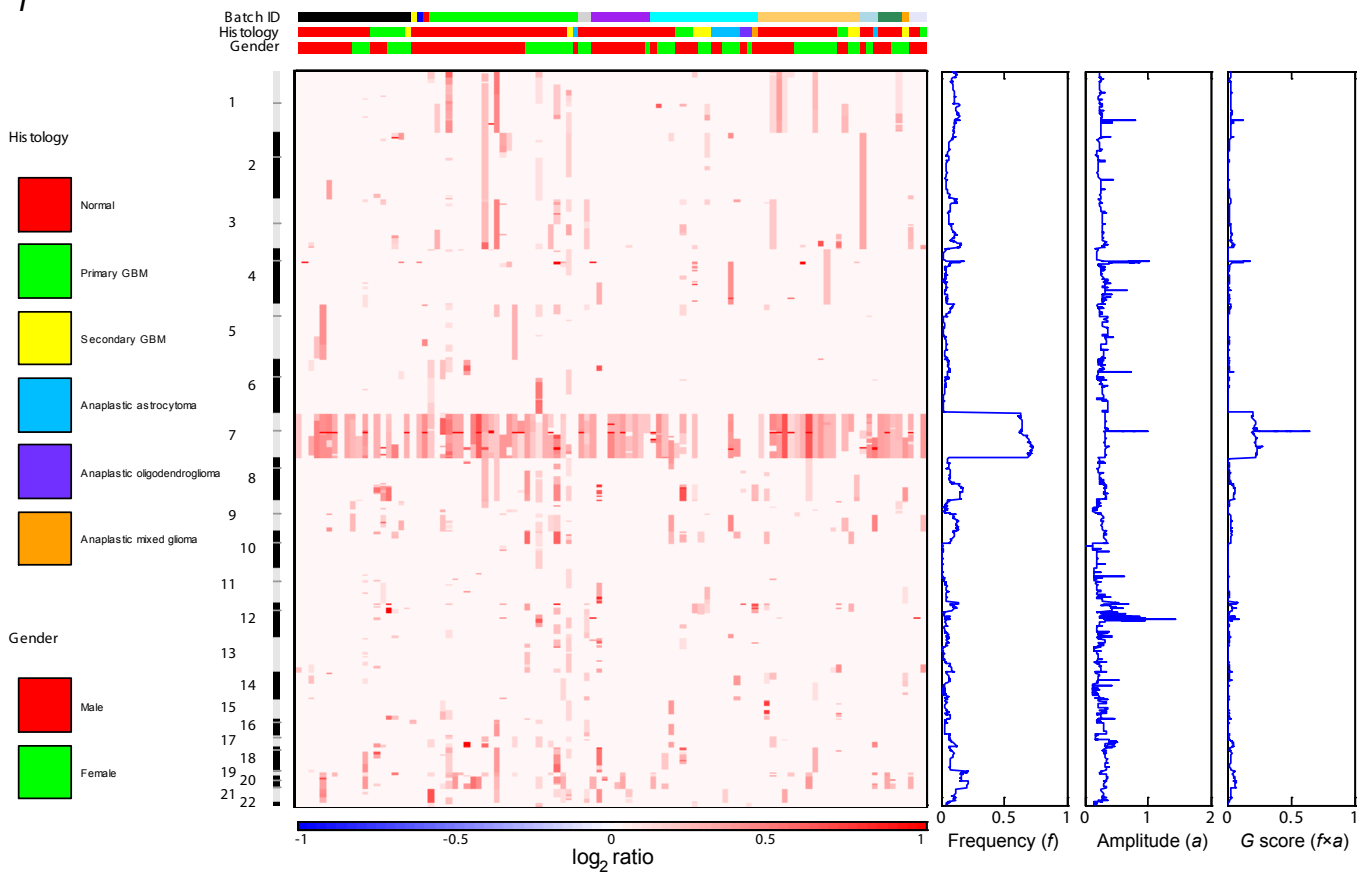

*j*

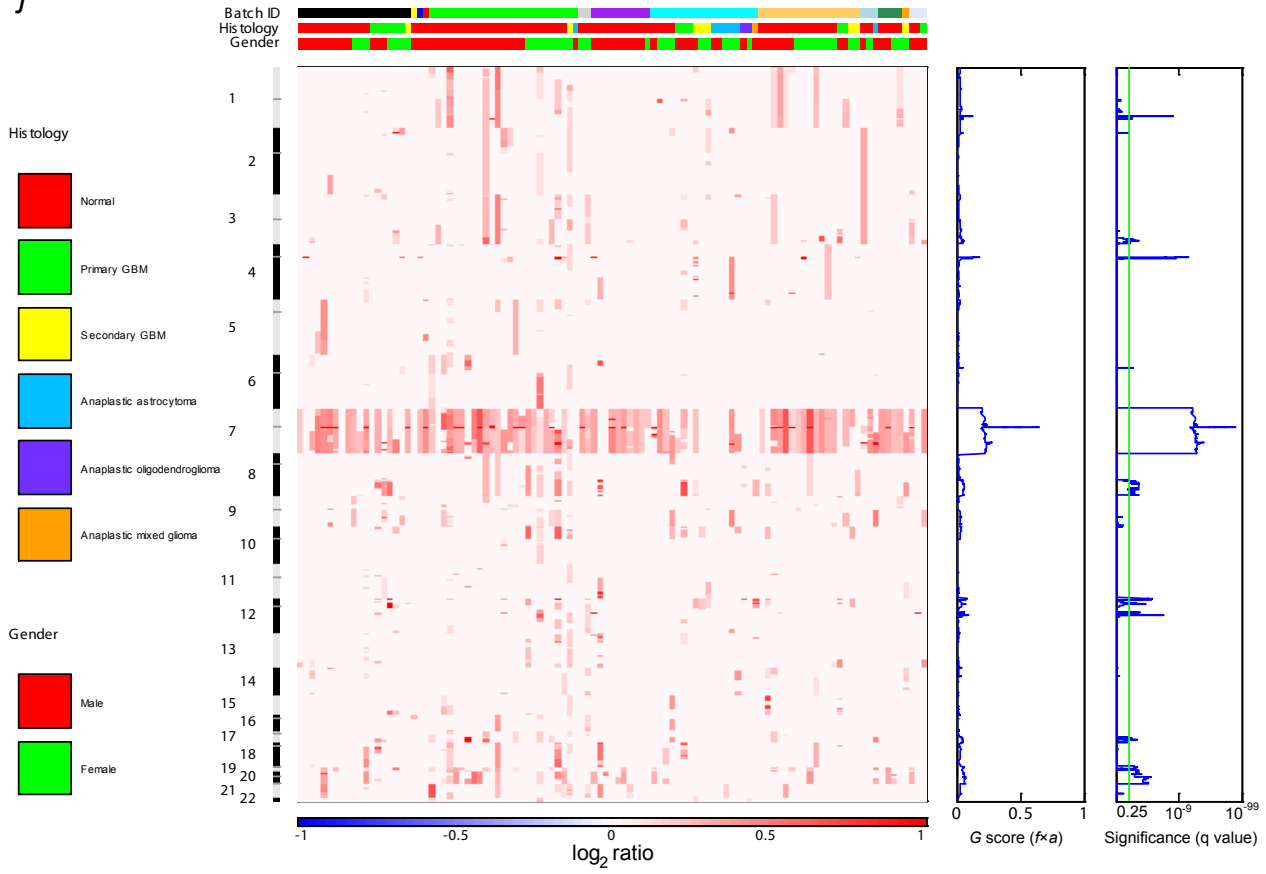

$k$

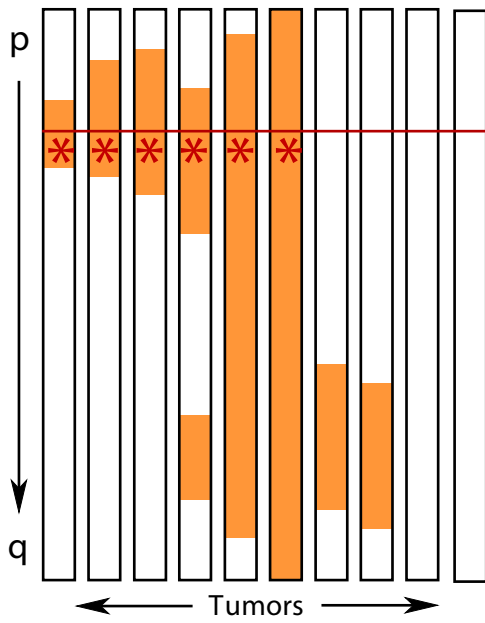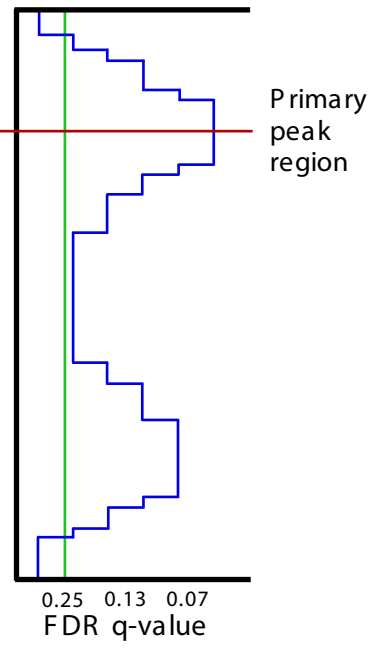

Remove all aberrations involving the primary peak region

Use remaining aberrations to recalculate G scores and q values

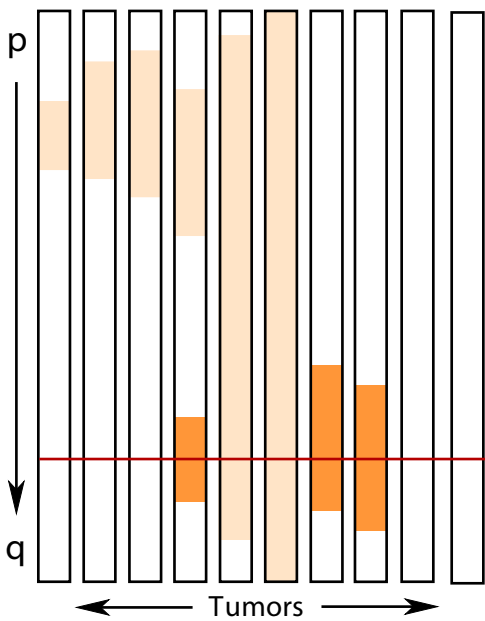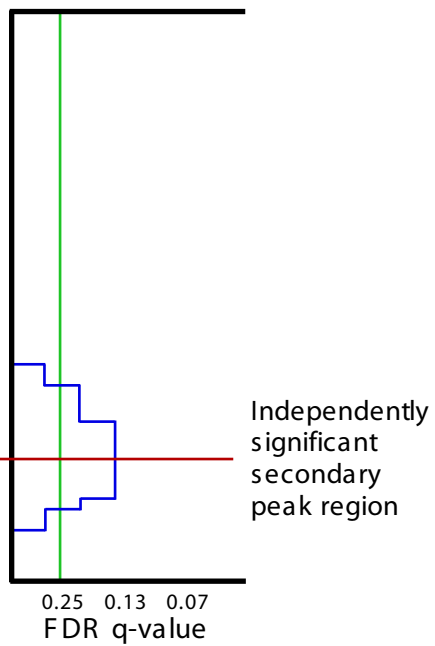

1

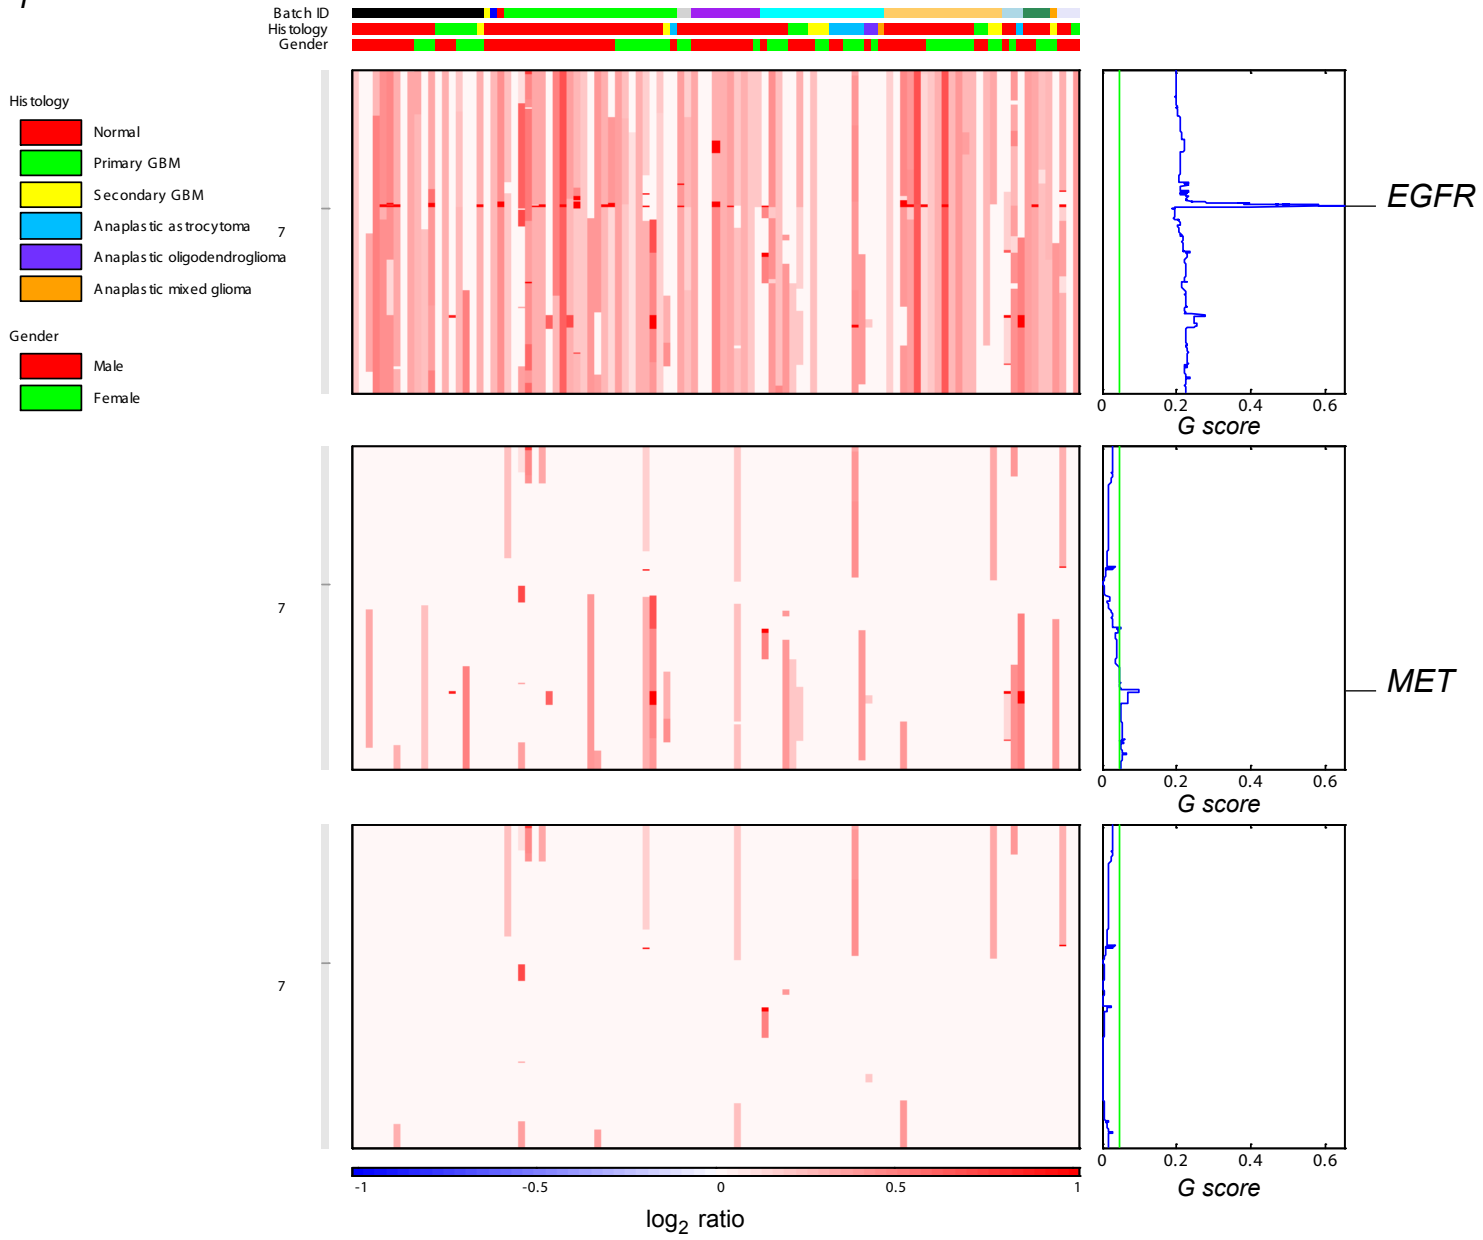

Supplement: pnas_0710052104_7.pdf [file pnas_0710052104_7.pdf]
