# Supplementary material
Source: PubMed Central journal article supplement (PMC2148413)

## Amplifications

Initial dataset (100K SNP, n=141)

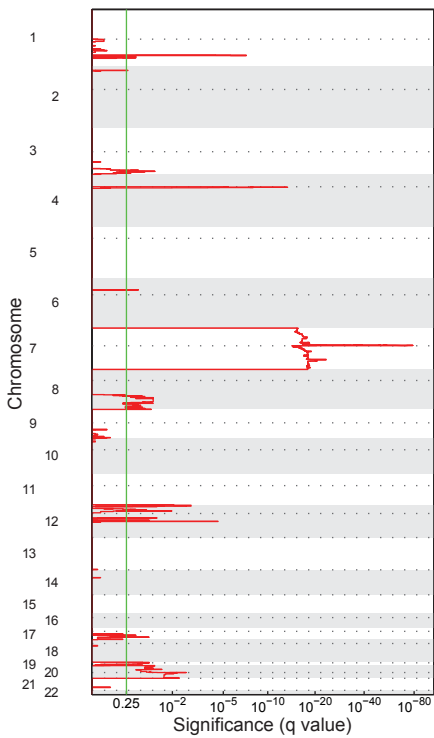

Kotliarov et al. (100K SNP, n=178)

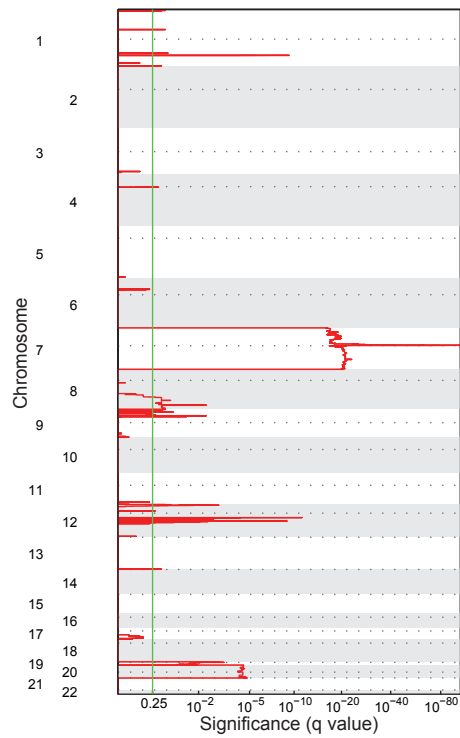

Maher et al. (16K aCGH, n=37)

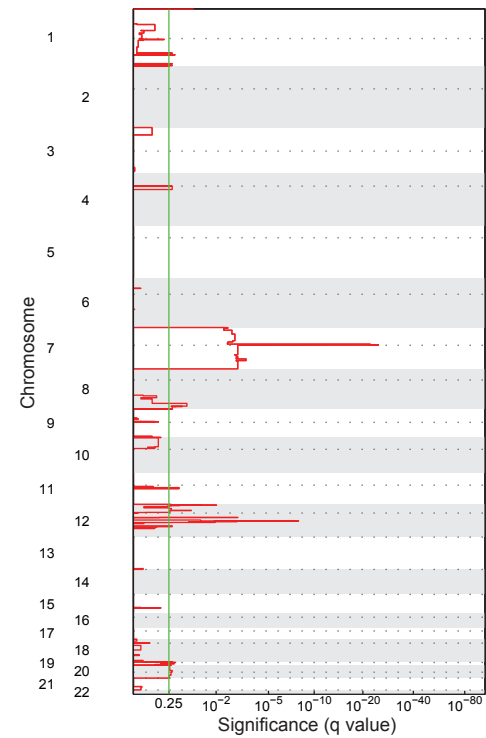

## Deletions

Initial dataset (100K SNP, n=141)

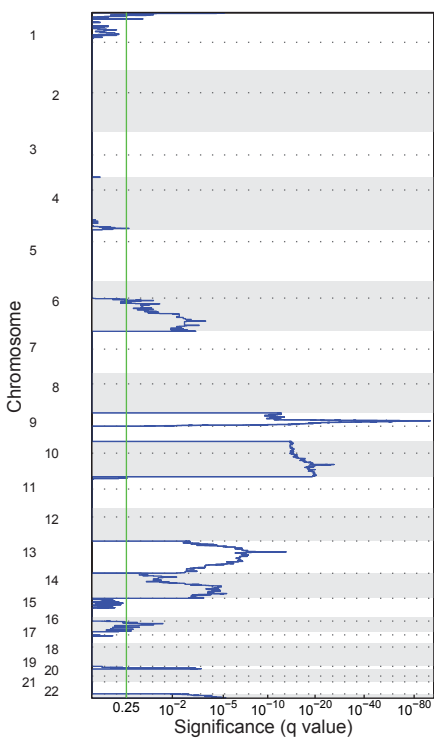

Kotliarov et al. (100K SNP, n=178)

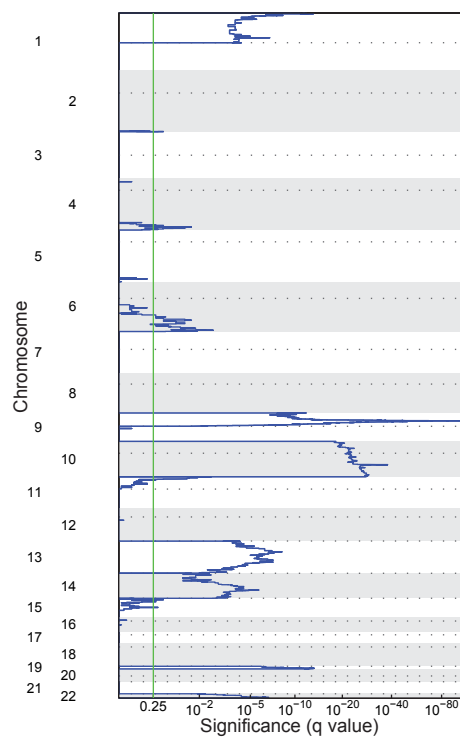

Maher et al. (16K aCGH, n=37)

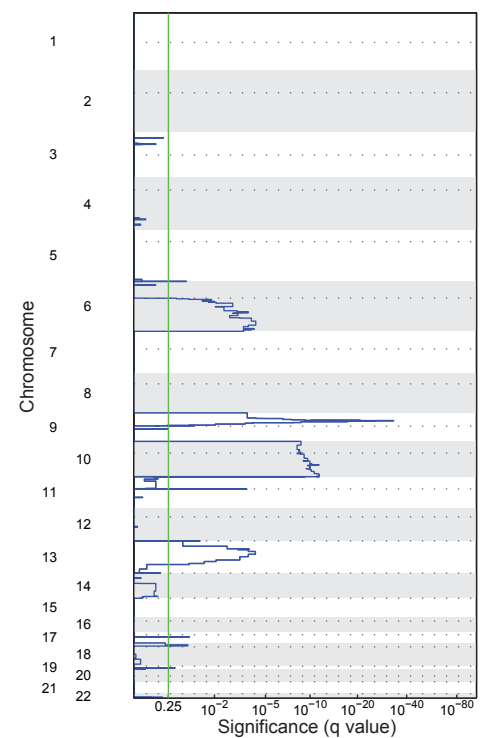

Supplement: pnas_0710052104_2.pdf [file pnas_0710052104_2.pdf]
