# Supplementary material
Source: PubMed Central journal article supplement (PMC2148413)

## Amplifications

Glioma (initial dataset, n=141)

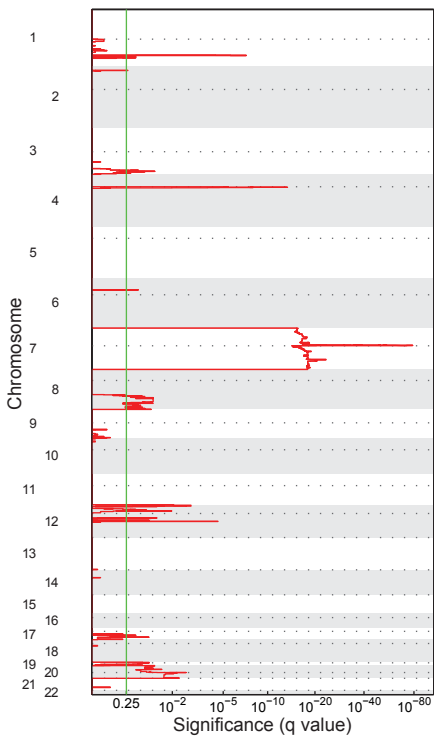

Lung cancer (n=81)

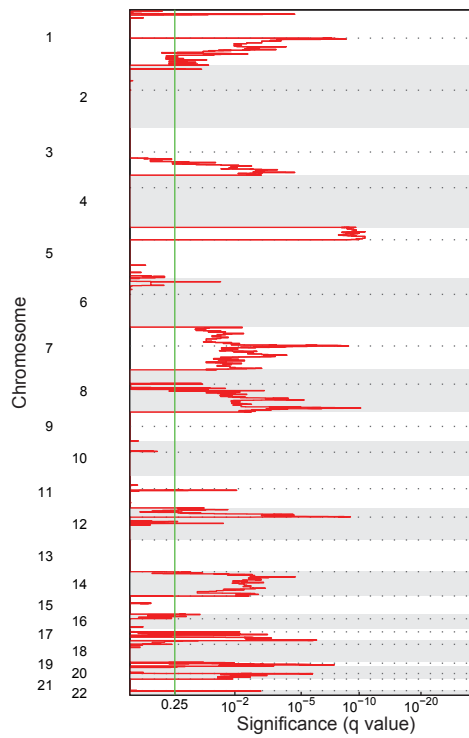

## Deletions

Glioma (initial dataset, n=141)

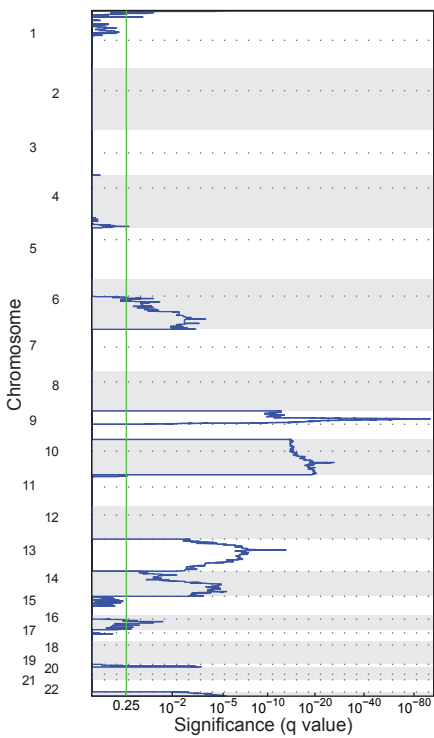

Lung cancer (n=81)

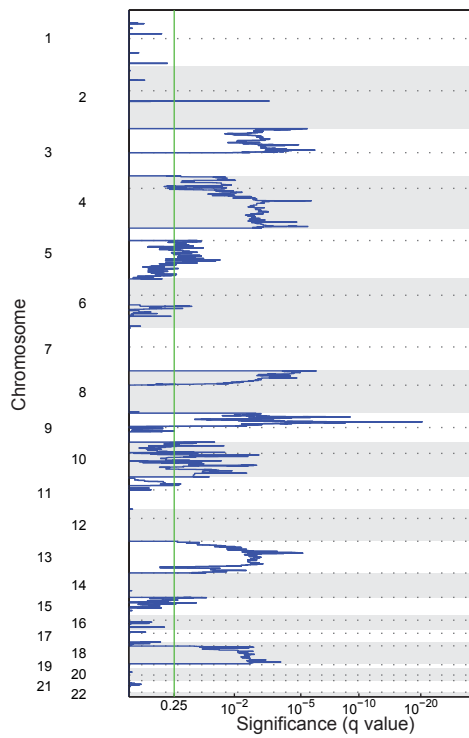

Supplement: pnas_0710052104_3.pdf [file pnas_0710052104_3.pdf]
