# Supplementary material
Source: PubMed Central journal article supplement (PMC2148413)

# Amplifications

All gliomas (n=141)

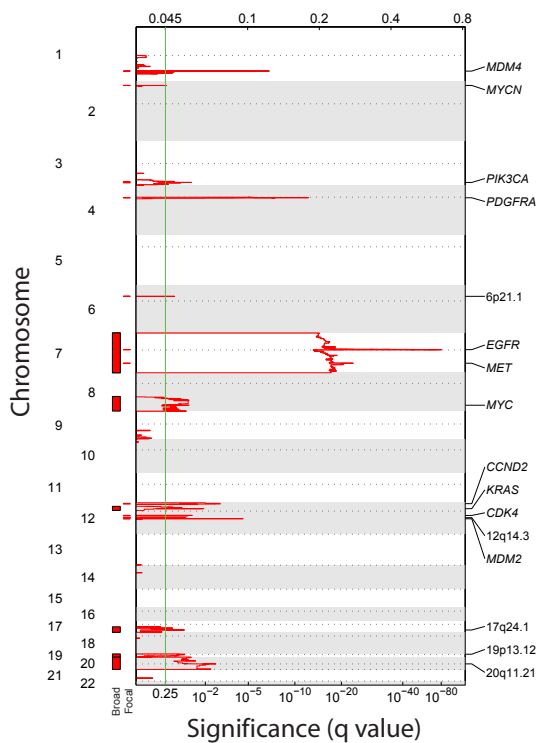

Primary GBMs (n=107)

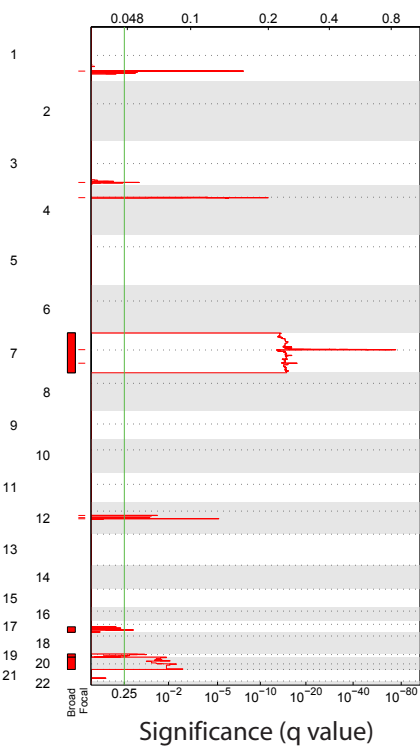

# Deletions

All gliomas (n=141)

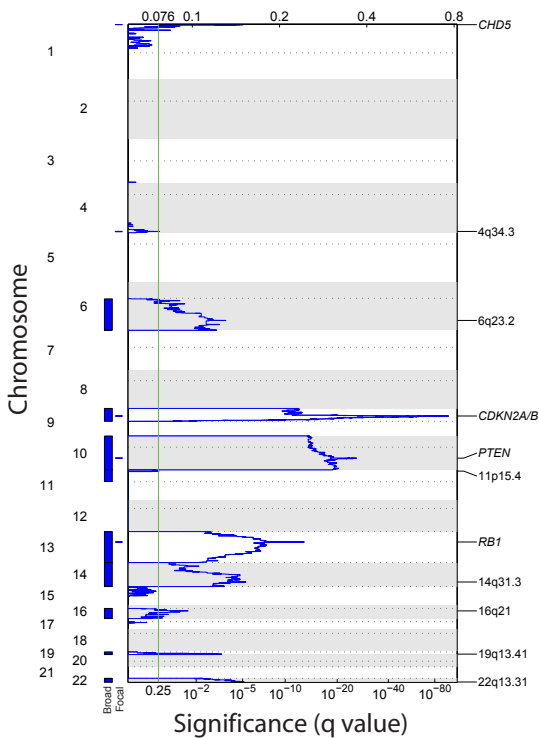

Primary GBMs (n=107)

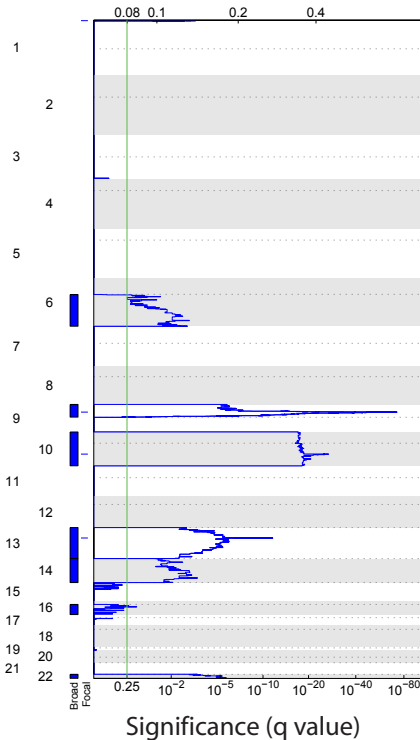

Supplement: pnas_0710052104_1.pdf [file pnas_0710052104_1.pdf]

**a**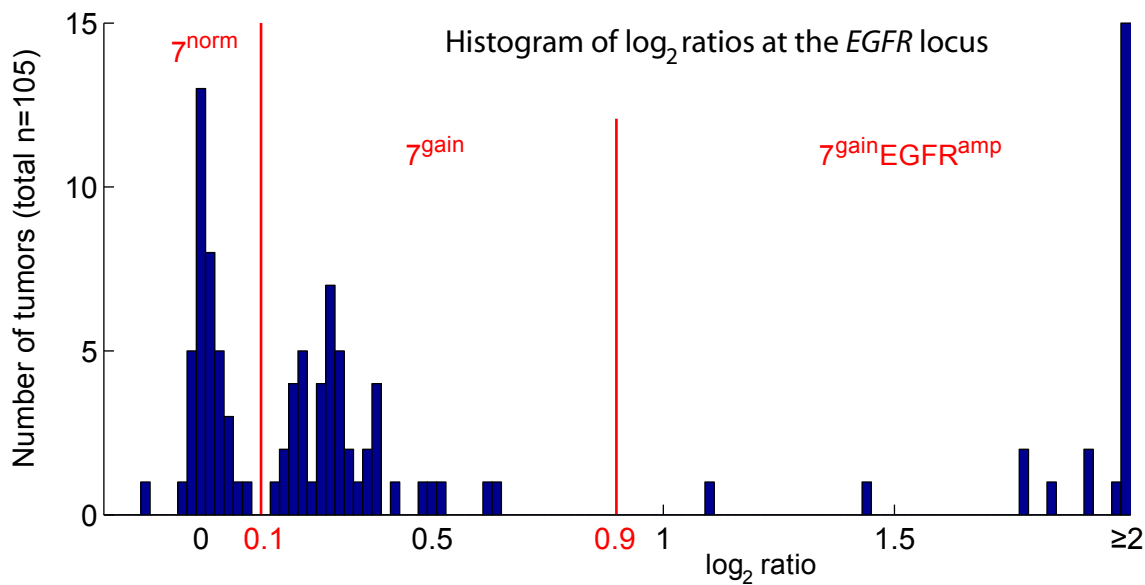**b**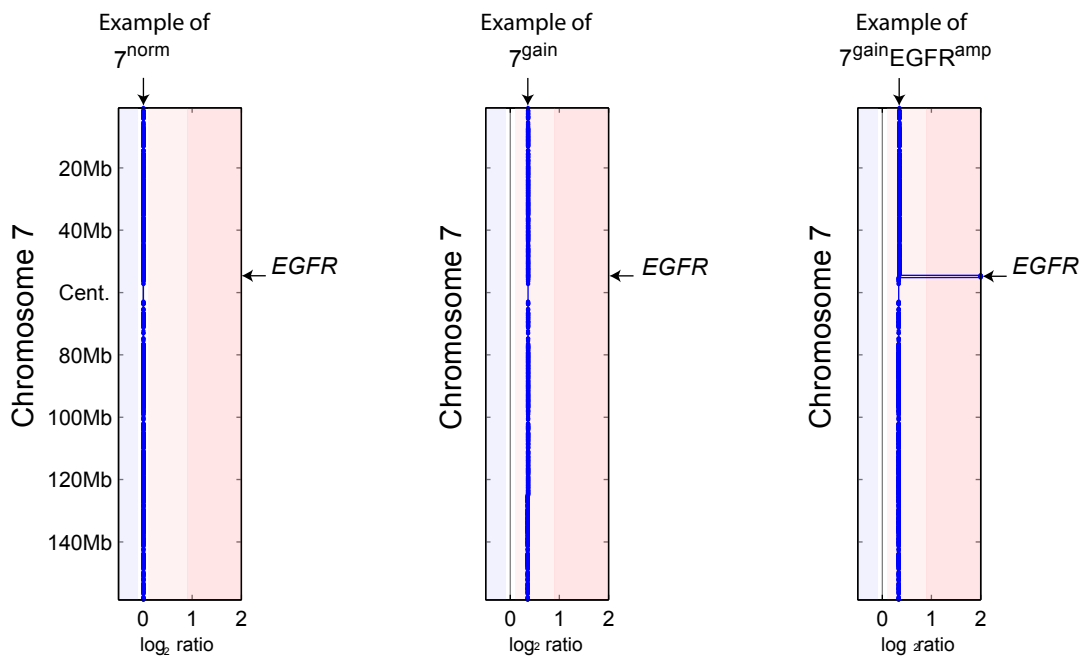

Supplement: pnas_0710052104_4.pdf [file pnas_0710052104_4.pdf]

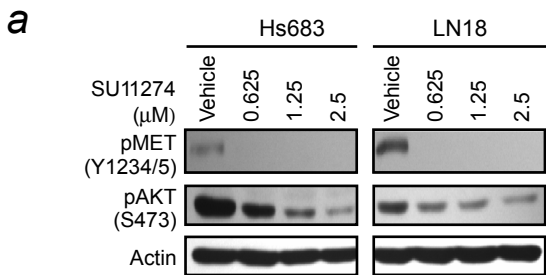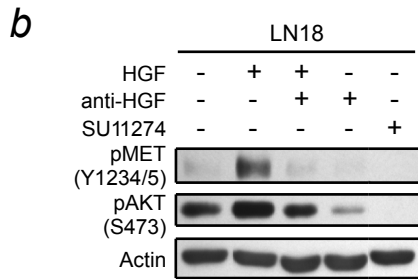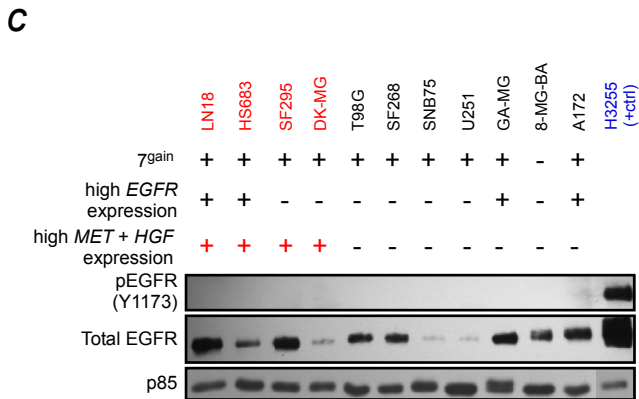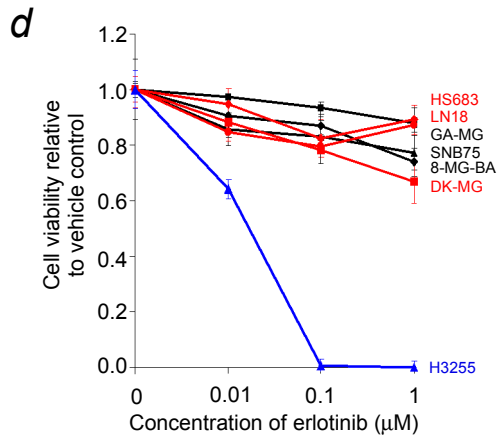

Supplement: pnas_0710052104_5.pdf [file pnas_0710052104_5.pdf]

# GISTIC Flow Chart

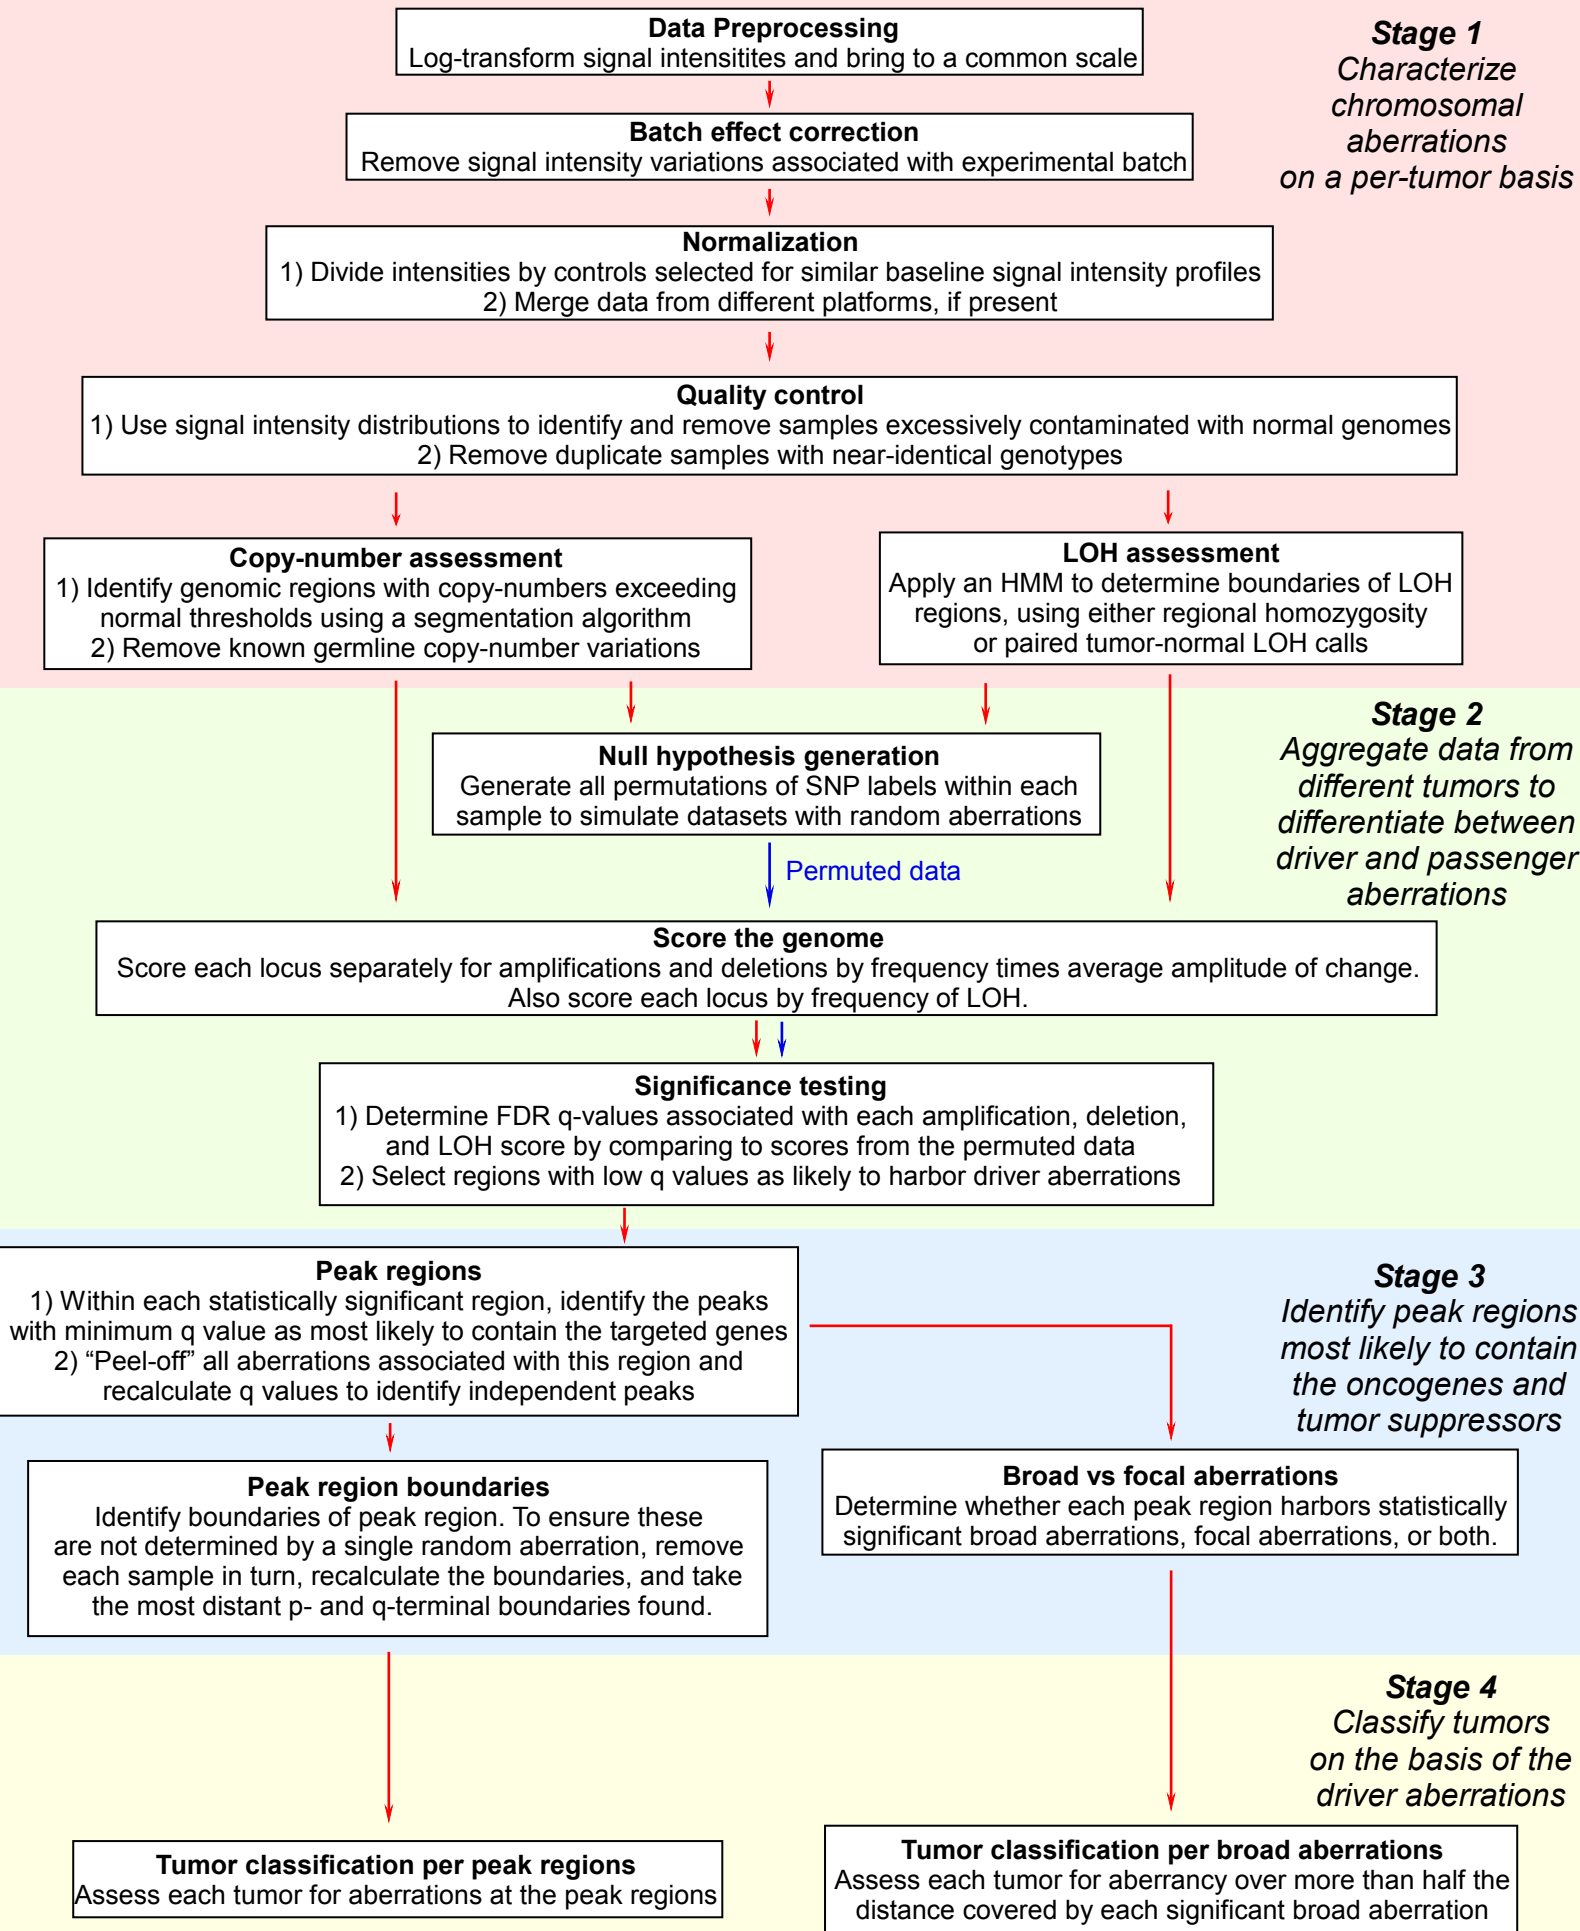

Supplement: pnas_0710052104_6.pdf [file pnas_0710052104_6.pdf]

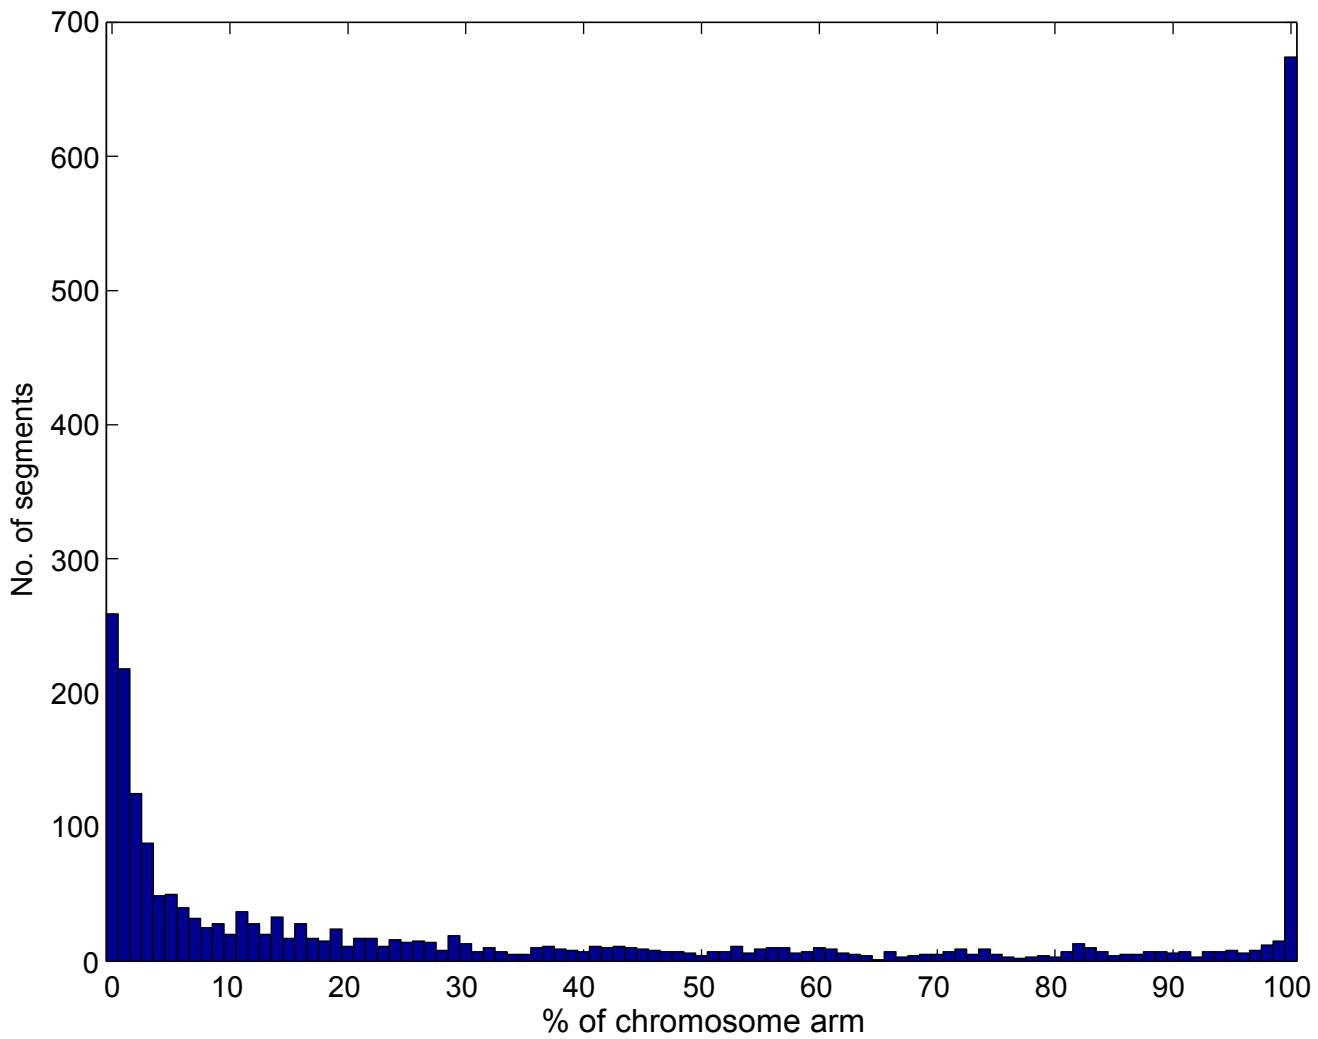

Supplement: pnas_0710052104_8.pdf [file pnas_0710052104_8.pdf]

**a**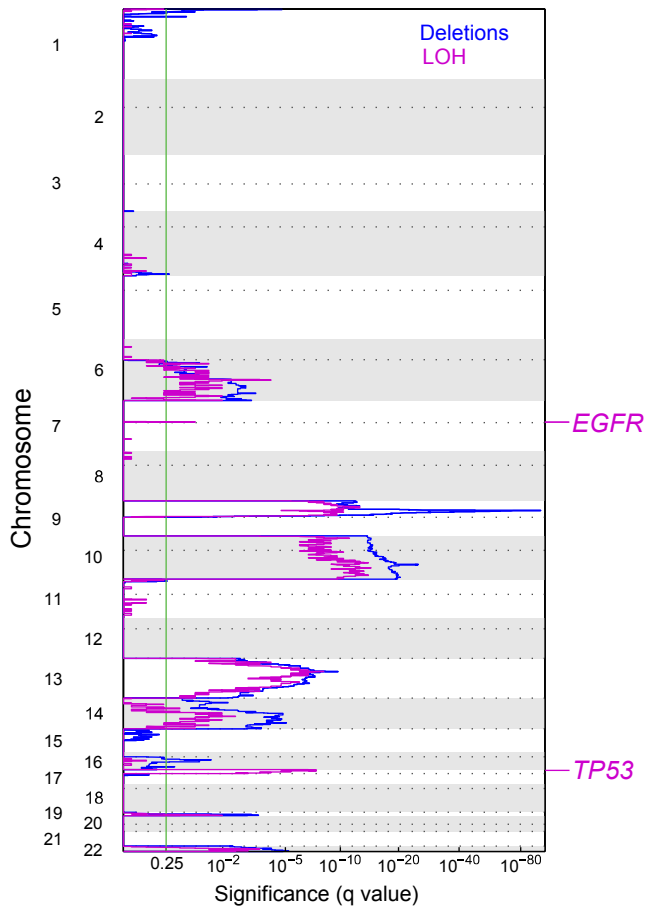**b**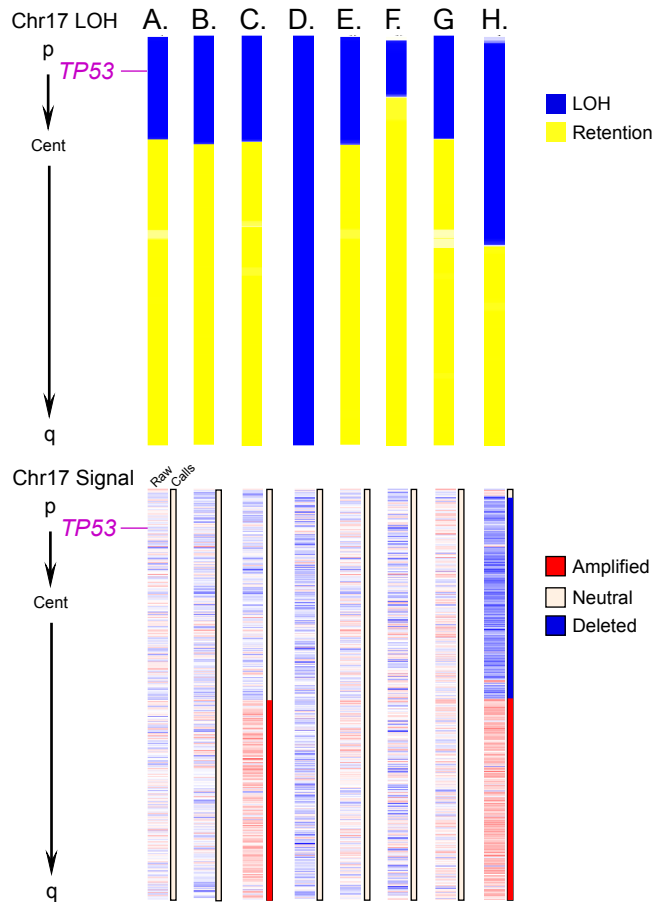

Supplement: pnas_0710052104_9.pdf [file pnas_0710052104_9.pdf]
